# Supplementary material for: Genome-wide identification and characterization of R2R3MYB family in Rosaceae
Source: PubMed Central journal article supplement — Genom Data. 2016 Jun 21;9:50–7. doi: 10.1016/j.gdata.2016.06.004 (PMC4927548; doi:10.1016/j.gdata.2016.06.004), 2016-06-21
Supplement: mmc1.pdf [file mmc1.pdf]

Table S 1. Relationship across Rosaceae genomes and predicted R2R3MYB based on R2R3MYB gene models collinearity.

Alignment 1: fv5 & pp5. Score=293.0; e-value=2.4e-09

|       | fv5       | pp5        | e-value   |
|-------|-----------|------------|-----------|
| 1- 1: | mrna32268 | ppa021568m | 1,00E-134 |
| 1- 2: | mrna31835 | ppa019529m | 1,00E-140 |
| 1- 3: | mrna25098 | ppa018430m | 2,00E-81  |
| 1- 4: | mrna26007 | ppa007562m | 2,00E-154 |
| 1- 5: | mrna26044 | ppa023143m | 3,00E-98  |
| 1- 6: | mrna09311 | ppa021779m | 9,00E-79  |

Alignment 2: fv6 & pp3. Score=332.0; e-value=4e-15

|       | fv6       | pp3        | e-value   |
|-------|-----------|------------|-----------|
| 2- 1: | mrna15383 | ppa024533m | 5,00E-77  |
| 2- 2: | mrna06920 | ppa015032m | 1,00E-141 |
| 2- 3: | mrna04232 | ppa016385m | 4,00E-61  |
| 2- 4: | mrna04423 | ppa006769m | 4,00E-158 |
| 2- 5: | mrna03817 | ppa008366m | 1,00E-139 |
| 2- 6: | mrna28435 | ppa011751m | 1,00E-108 |
| 2- 7: | mrna28021 | ppa026877m | 1,00E-131 |

Alignment 3: md12 & pp2. Score = 297.0; e-value=3.4e-08

|       | md12          | pp2        | e-value   |
|-------|---------------|------------|-----------|
| 3- 1: | MDP0000308403 | ppa007268m | 0         |
| 3- 2: | MDP0000157940 | ppa009439m | 8,00E-141 |
| 3- 3: | MDP0000693678 | ppa017892m | 2,00E-124 |
| 3- 4: | MDP0000787808 | ppa011549m | 1,00E-116 |
| 3- 5: | MDP0000152575 | ppa019729m | 1,00E-152 |
| 3- 6: | MDP0000574942 | ppa017039m | 1,00E-80  |

Alignment 4: md10 & md5. Score=296.0; e-value=6.5e-10

|       | md10          | md5           | e-value   |
|-------|---------------|---------------|-----------|
| 4- 1: | MDP0000291518 | MDP0000852158 | 0         |
| 4- 2: | MDP0000897594 | MDP0000145050 | 4,00E-150 |
| 4- 3: | MDP0000215675 | MDP0000133542 | 4,00E-176 |
| 4- 4: | MDP0000226667 | MDP0000289671 | 4,00E-177 |
| 4- 5: | MDP0000492221 | MDP0000197283 | 0         |
| 4- 1: | MDP0000143487 | MDP0000245462 | 6,00E-141 |

Alignment 5: md14 & pp5. Score=294.0; e-value=2.6e-09

|       | md14          | pp5        | e-value   |
|-------|---------------|------------|-----------|
| 5- 1: | MDP0000318376 | ppa019529m | 1,00E-90  |
| 5- 2: | MDP0000852549 | ppa018561m | 0         |
| 5- 3: | MDP0000642761 | ppa010908m | 5,00E-122 |
| 5- 4: | MDP0000298505 | ppa023143m | 1,00E-126 |
| 5- 5: | MDP0000211677 | ppa011954m | 6,00E-109 |
| 5- 6: | MDP0000265114 | ppa021779m | 7,00E-84  |

Alignment 6: md15 & pp1. Score=336.0; e-value=5.4e-21

|       | md15          | pp1        | e-value   |
|-------|---------------|------------|-----------|
| 6- 1: | MDP0000261265 | ppa026916m | 2,00E-113 |
| 6- 2: | MDP0000184538 | ppa015883m | 2,00E-68  |
| 6- 3: | MDP0000031172 | ppa022205m | 2,00E-89  |
| 6- 4: | MDP0000262514 | ppa024417m | 9,00E-142 |
| 6- 5: | MDP0000165715 | ppa008979m | 3,00E-134 |
| 6- 5: | MDP0000477900 | ppa010735m | 6,00E-105 |
| 6- 5: | MDP0000175918 | ppa008906m | 5,00E-134 |

---

Alignment 7: md17 & md 9. Score=292.0; e-value=7.4e-14

|       | md17          | md9           | e-value   |
|-------|---------------|---------------|-----------|
| 7- 1: | MDP0000144744 | MDP0000219359 | 0         |
| 7- 2: | MDP0000742771 | MDP0000278681 | 0         |
| 7- 3: | MDP0000468201 | MDP0000710259 | 8,00E-110 |
| 7- 4: | MDP0000148689 | MDP0000155426 | 4,00E-61  |
| 7- 5: | MDP0000175835 | MDP0000176798 | 1,00E-157 |
| 7- 6: | MDP0000823458 | MDP0000193056 | 5,00E-161 |

Alignment 8: md17 & pp3. Score=396.0; e-value=1.6e17

|       | md17          | pp3        | e-value   |
|-------|---------------|------------|-----------|
| 8- 1: | MDP0000344978 | ppa011751m | 2,00E-128 |
| 8- 2: | MDP0000144744 | ppa008366m | 3,00E-175 |
| 8- 3: | MDP0000742771 | ppa006769m | 5,00E-168 |
| 8- 4: | MDP0000286143 | ppa016385m | 2,00E-87  |
| 8- 5: | MDP0000468201 | ppa016708m | 0         |
| 8- 6: | MDP0000148689 | ppa025095m | 1,00E-98  |
| 8- 7: | MDP0000407613 | ppa026553m | 2,00E-119 |
| 8- 8: | MDP0000175835 | ppa017451m | 0         |

Alignment 9: md8 & pp1. Score=297.0; e-value=6.9e-12

|       | md8           | pp1        | e-value   |
|-------|---------------|------------|-----------|
| 9- 1: | MDP0000166645 | ppa023812m | 1,00E-82  |
| 9- 2: | MDP0000266156 | ppa019554m | 7,00E-108 |
| 9- 3: | MDP0000786507 | ppa024417m | 7,00E-146 |
| 9- 4: | MDP0000463846 | ppa008979m | 1,00E-142 |
| 9- 5: | MDP0000894463 | ppa010735m | 8,00E-107 |
| 9- 6: | MDP0000135594 | ppa008906m | 1,00E-115 |

Alignment 10: md9 vs pp3. Score=329.0; e-value=1.4e-18

|        | md9           | pp3        | e-value   |
|--------|---------------|------------|-----------|
| 10- 1: | MDP0000303239 | ppa026877m | 2,00E-121 |
| 10- 2: | MDP0000284846 | ppa019507m | 1,00E-93  |
| 10- 3: | MDP0000219359 | ppa008366m | 2,00E-163 |
| 10- 4: | MDP0000278681 | ppa006769m | 3,00E-166 |
| 10- 5: | MDP0000710259 | ppa016708m | 1,00E-102 |
| 10- 6: | MDP0000155426 | ppa026553m | 6,00E-120 |
| 10- 7: | MDP0000176798 | ppa017451m | 6,00E-122 |
| 10- 8: | MDP0000159011 | ppa010716m | 3,00E-157 |

---

pp: *Prunus persica* , md: *Malus domestica* and fv: *Fragaria vesca* , meanwhile the number indicate the analyzed chromosome .
