# Supplementary material for: Genome-wide identification and characterization of R2R3MYB family in Rosaceae
Source: PubMed Central journal article supplement — Genom Data. 2016 Jun 21;9:50–7. doi: 10.1016/j.gdata.2016.06.004 (PMC4927548; doi:10.1016/j.gdata.2016.06.004), 2016-06-21
Supplement: mmc2.pdf [file mmc2.pdf]

a)

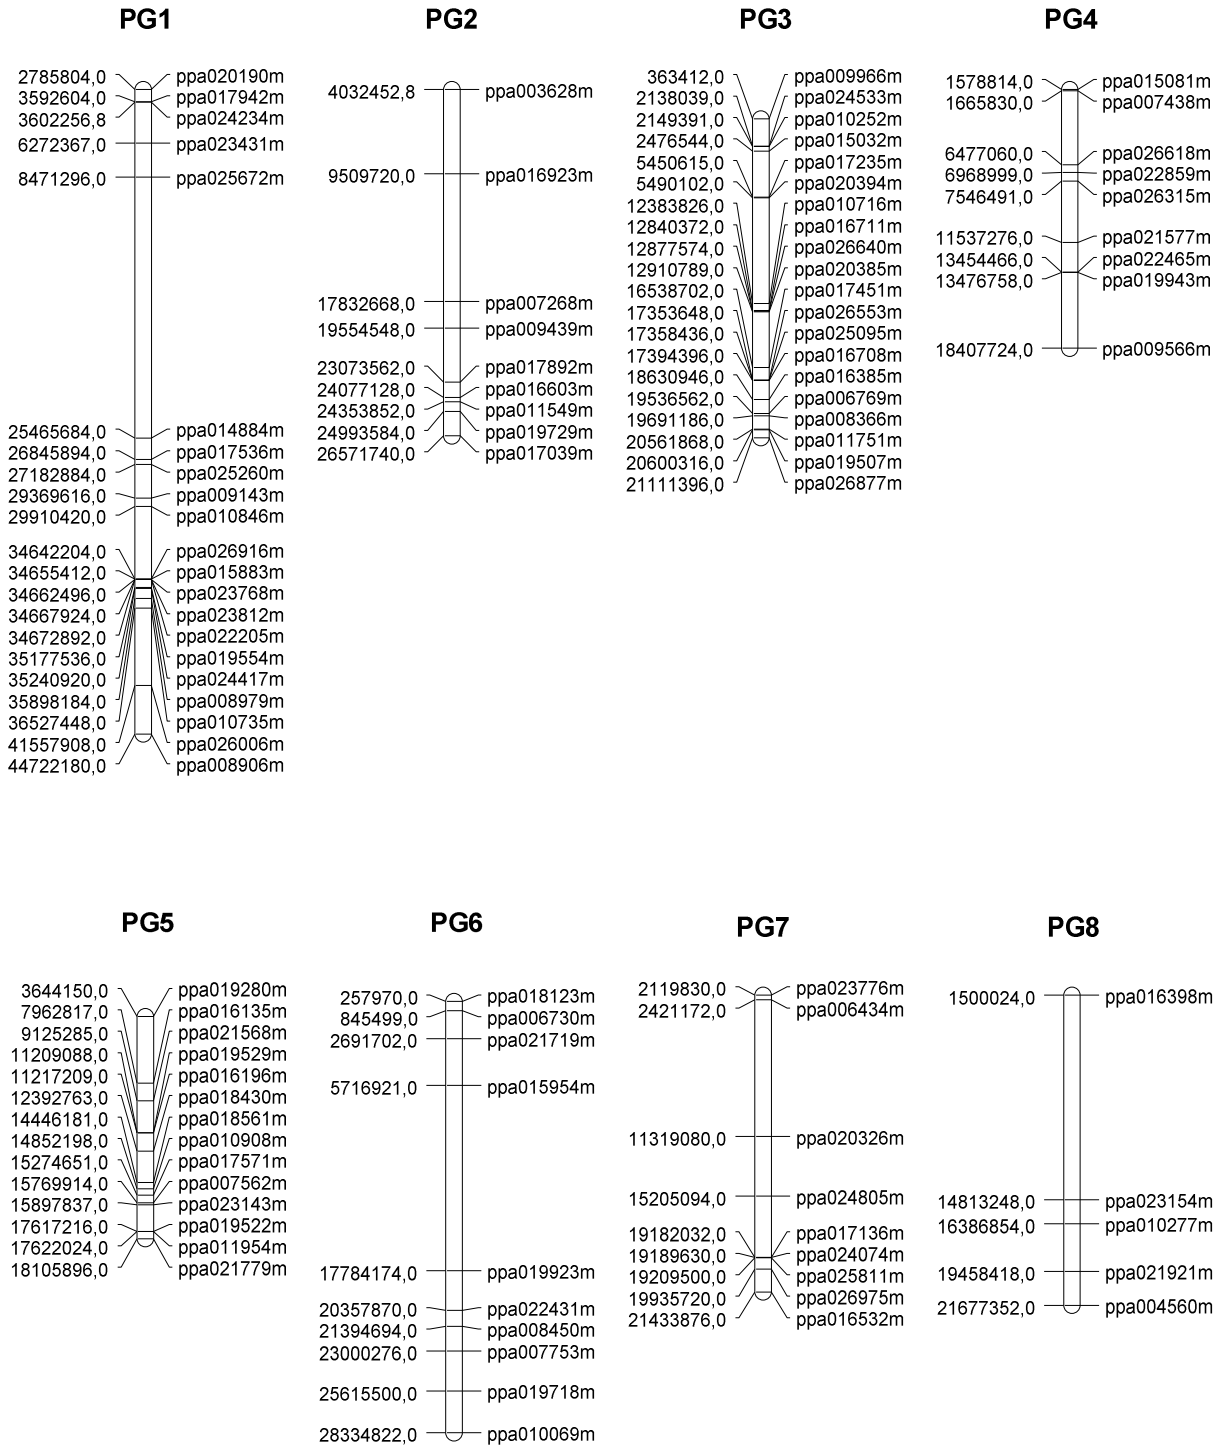

**Fig. S1.** Linkage groups and chromosomal positioning of the gene models found peach (a), strawberry (b) and apple (c).

b)

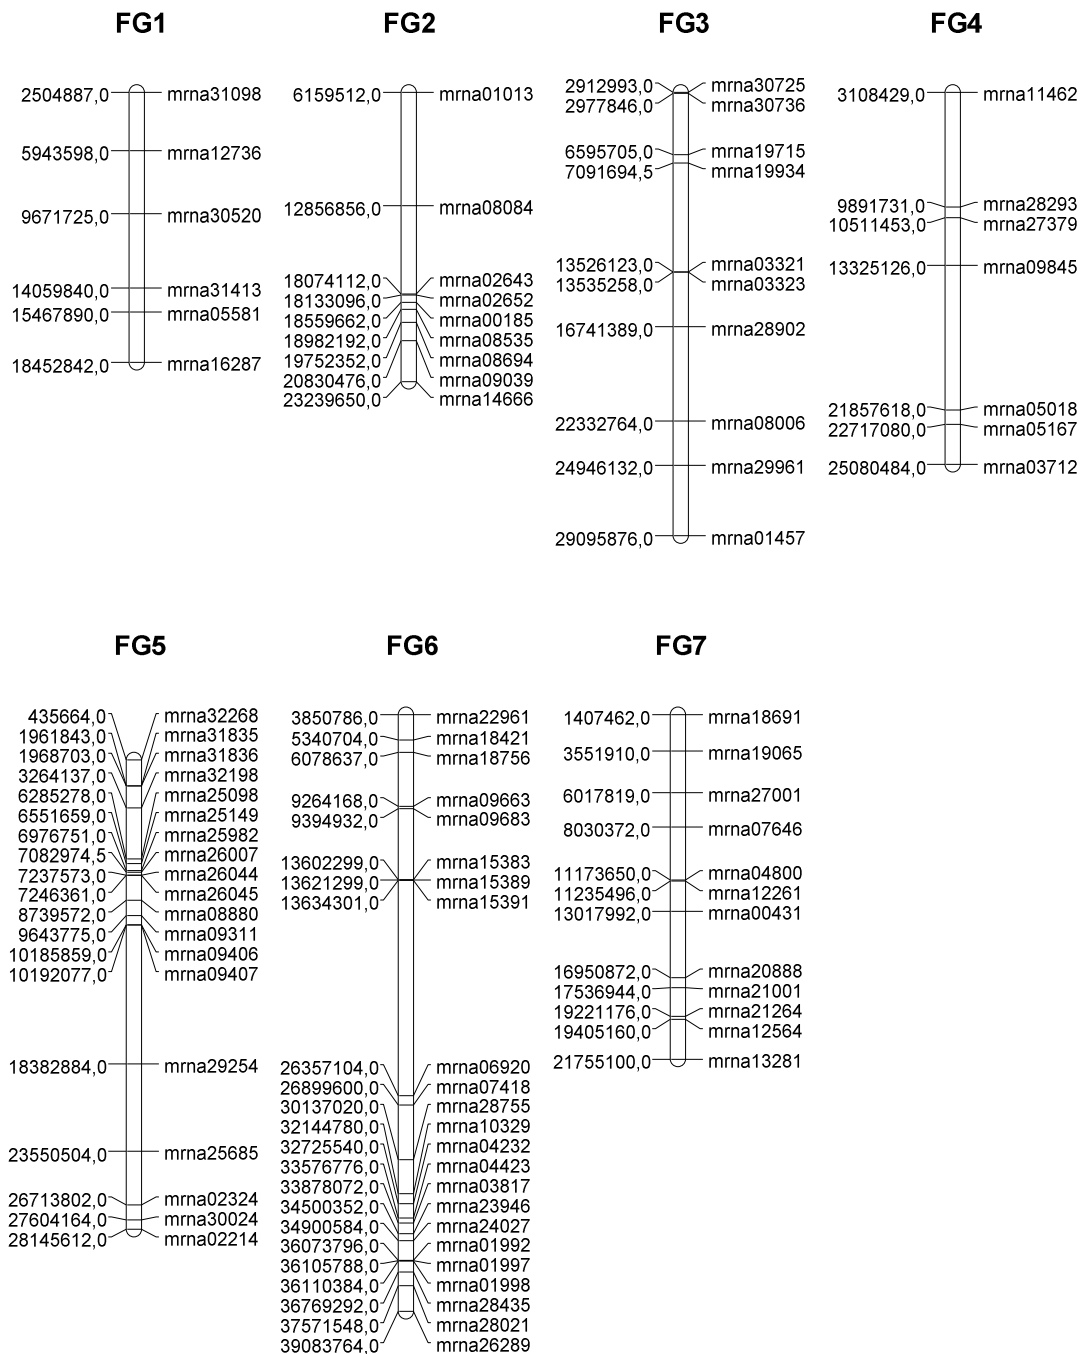

**Fig. S1.** Linkage groups and chromosomal positioning of the gene models found peach (a), strawberry (b) and apple (c).

c)

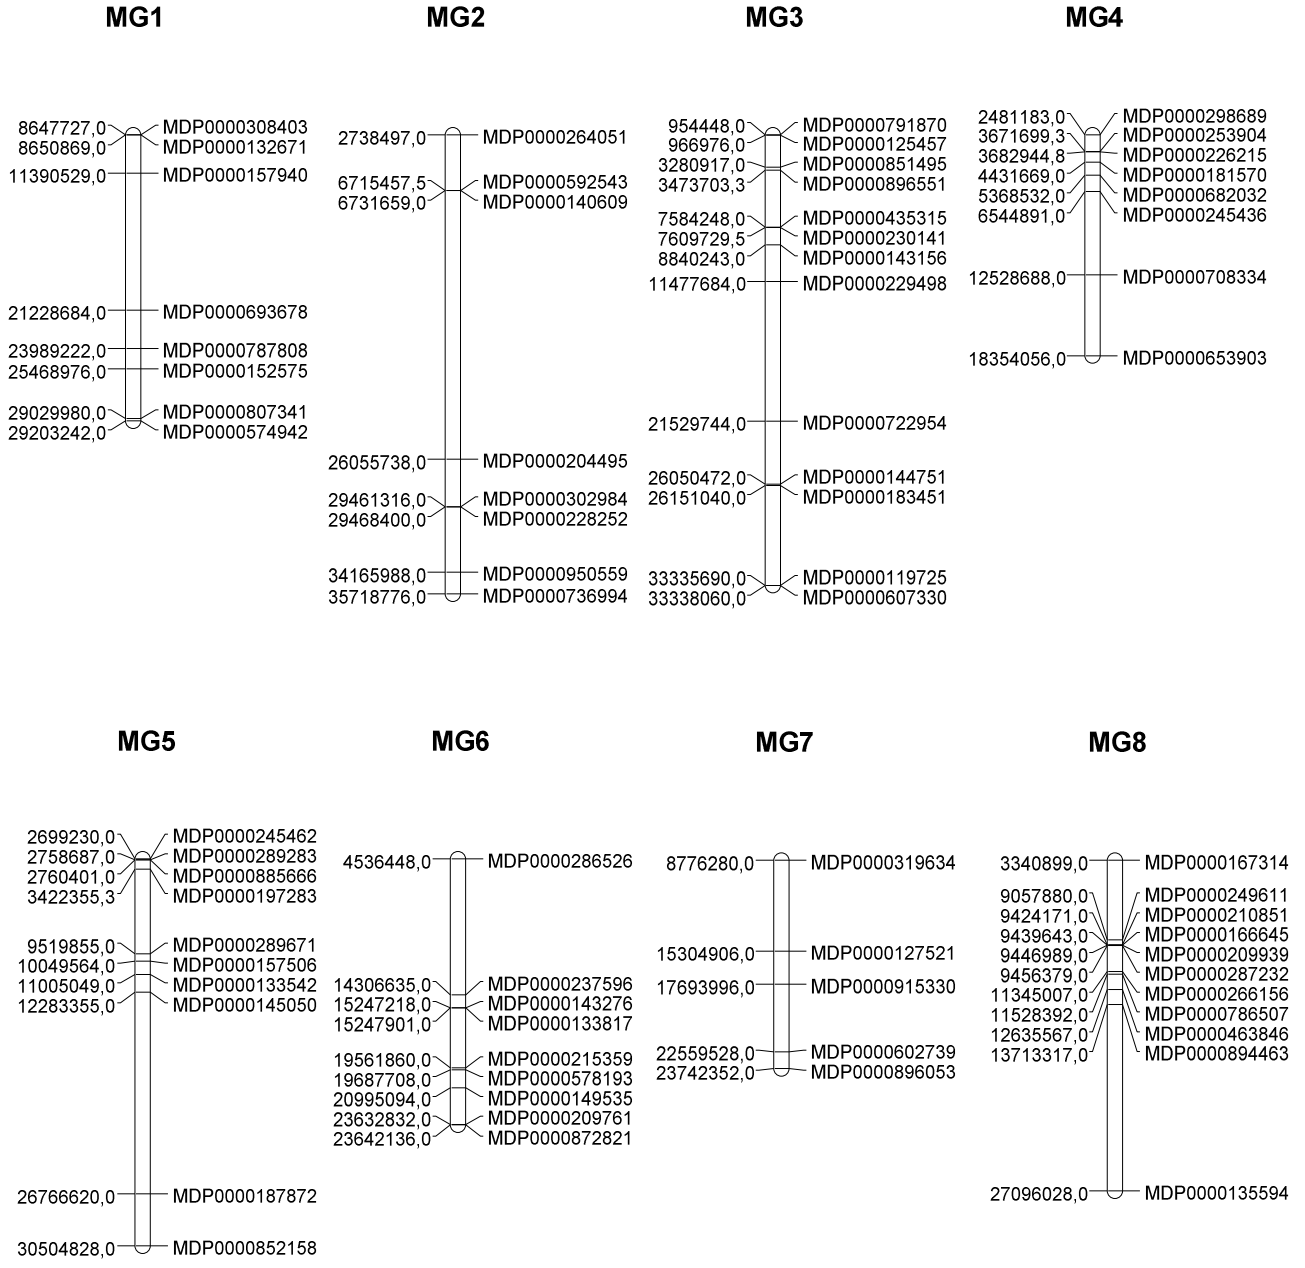

**Fig. S1.** Linkage groups and chromosomal positioning of the gene models found peach (a), strawberry (b) and apple (c).

c)

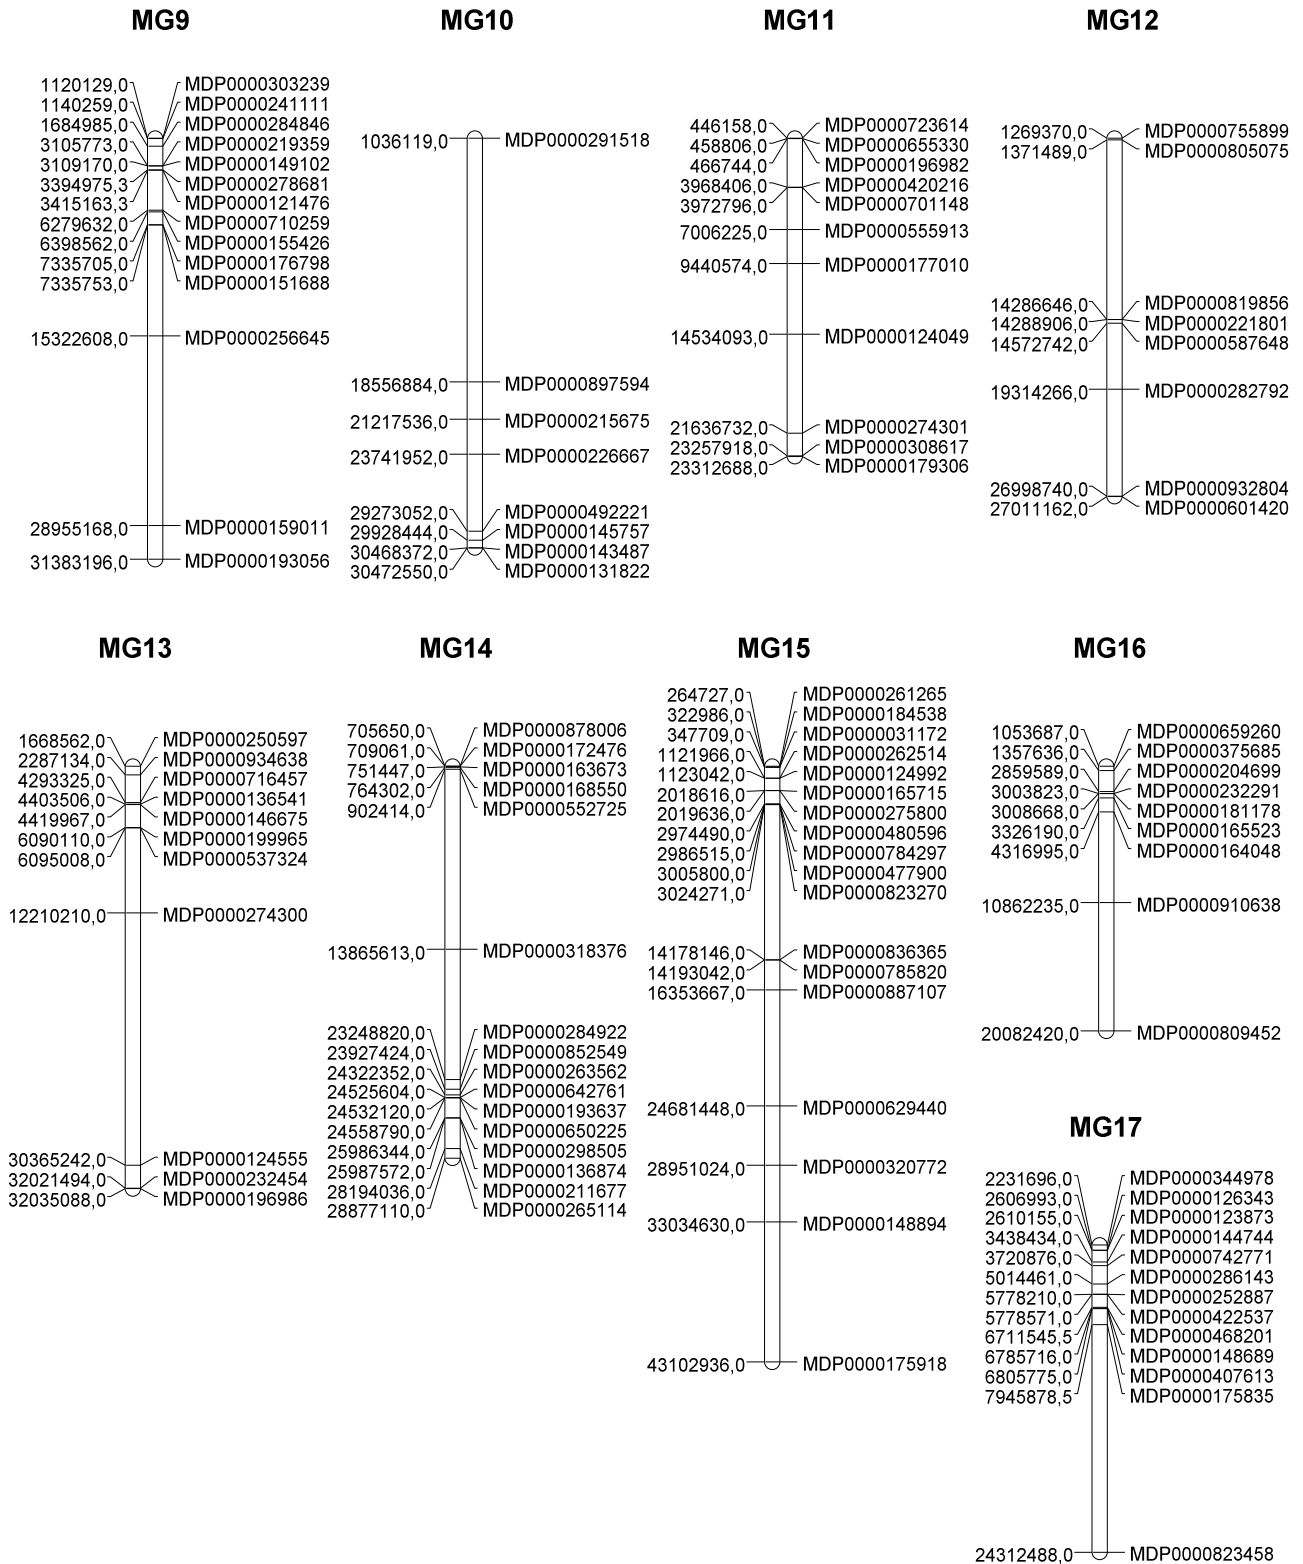

**Fig. S1.** Linkage groups and chromosomal positioning of the gene models found peach (a), strawberry (b) and apple (c).
