# Supplementary material for: Genome-wide identification and characterization of R2R3MYB family in Rosaceae
Source: PubMed Central journal article supplement — Genom Data. 2016 Jun 21;9:50–7. doi: 10.1016/j.gdata.2016.06.004 (PMC4927548; doi:10.1016/j.gdata.2016.06.004), 2016-06-21
Supplement: mmc3.pdf [file mmc3.pdf]

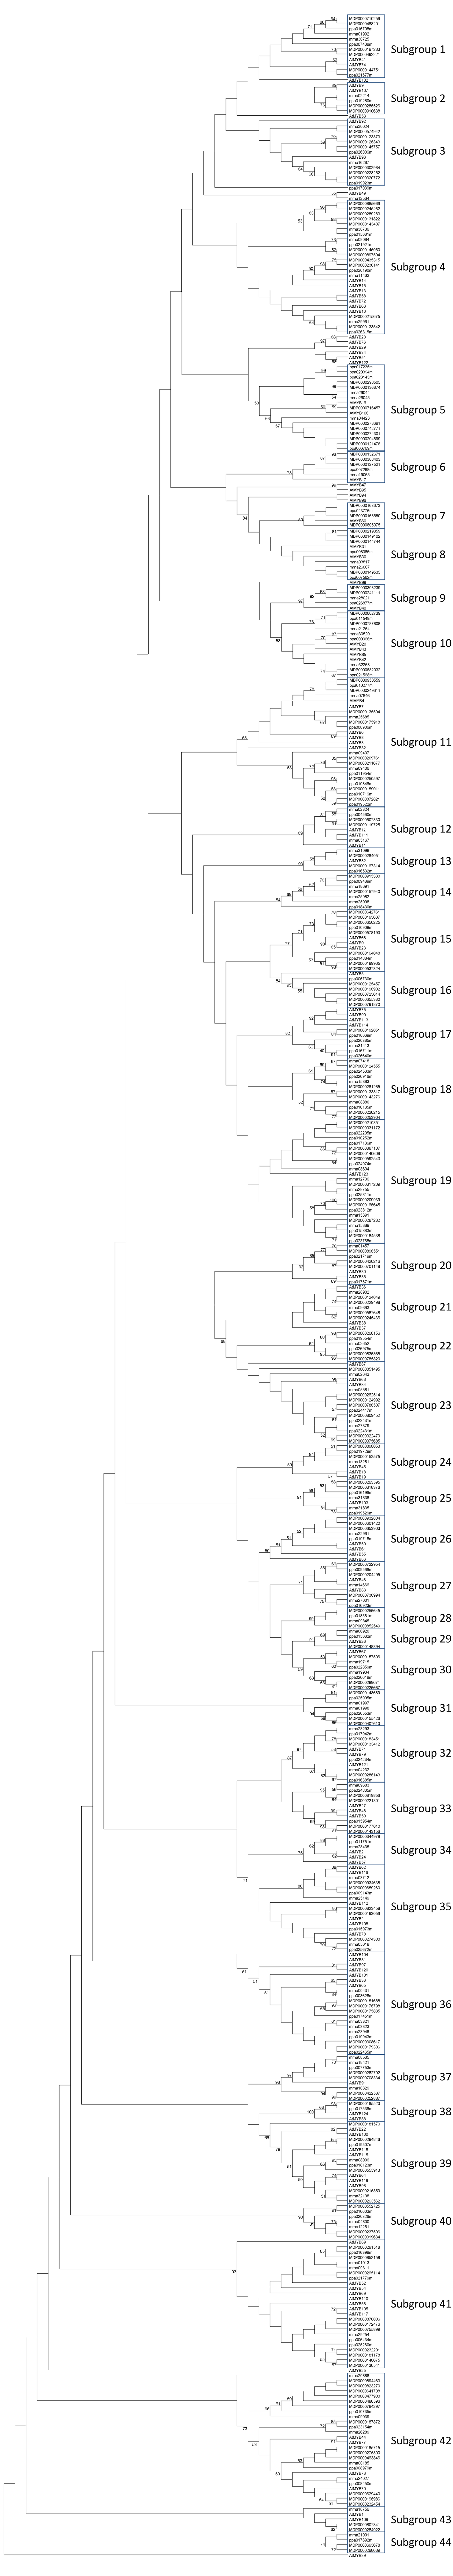

**Fig. S2.** Phylogenetic relationships and strawberry designations in R2R3MYB proteins from Rosaceae. The neighbor-joining tree includes 126 protein sequences of Arabidopsis (At), 86 from strawberry (Fv), 99 from peach (Pp) and 186 from apple (Md).
